# Supplementary material for: Remodeling of Substance P Sensory Nerves and Transient Receptor Potential Melastatin 8 (TRPM8) Cold Receptors After Corneal Experimental Surgery
Source: PubMed Central journal article supplement — Invest Ophthalmol Vis Sci. 2019 Jun;60(7):2449–60. doi: 10.1167/iovs.18-26384 (PMC6545819; doi:10.1167/iovs.18-26384), 2019-06
Supplement: iovs-60-06-37_s01.pdf [file iovs-60-06-37_s01.pdf]

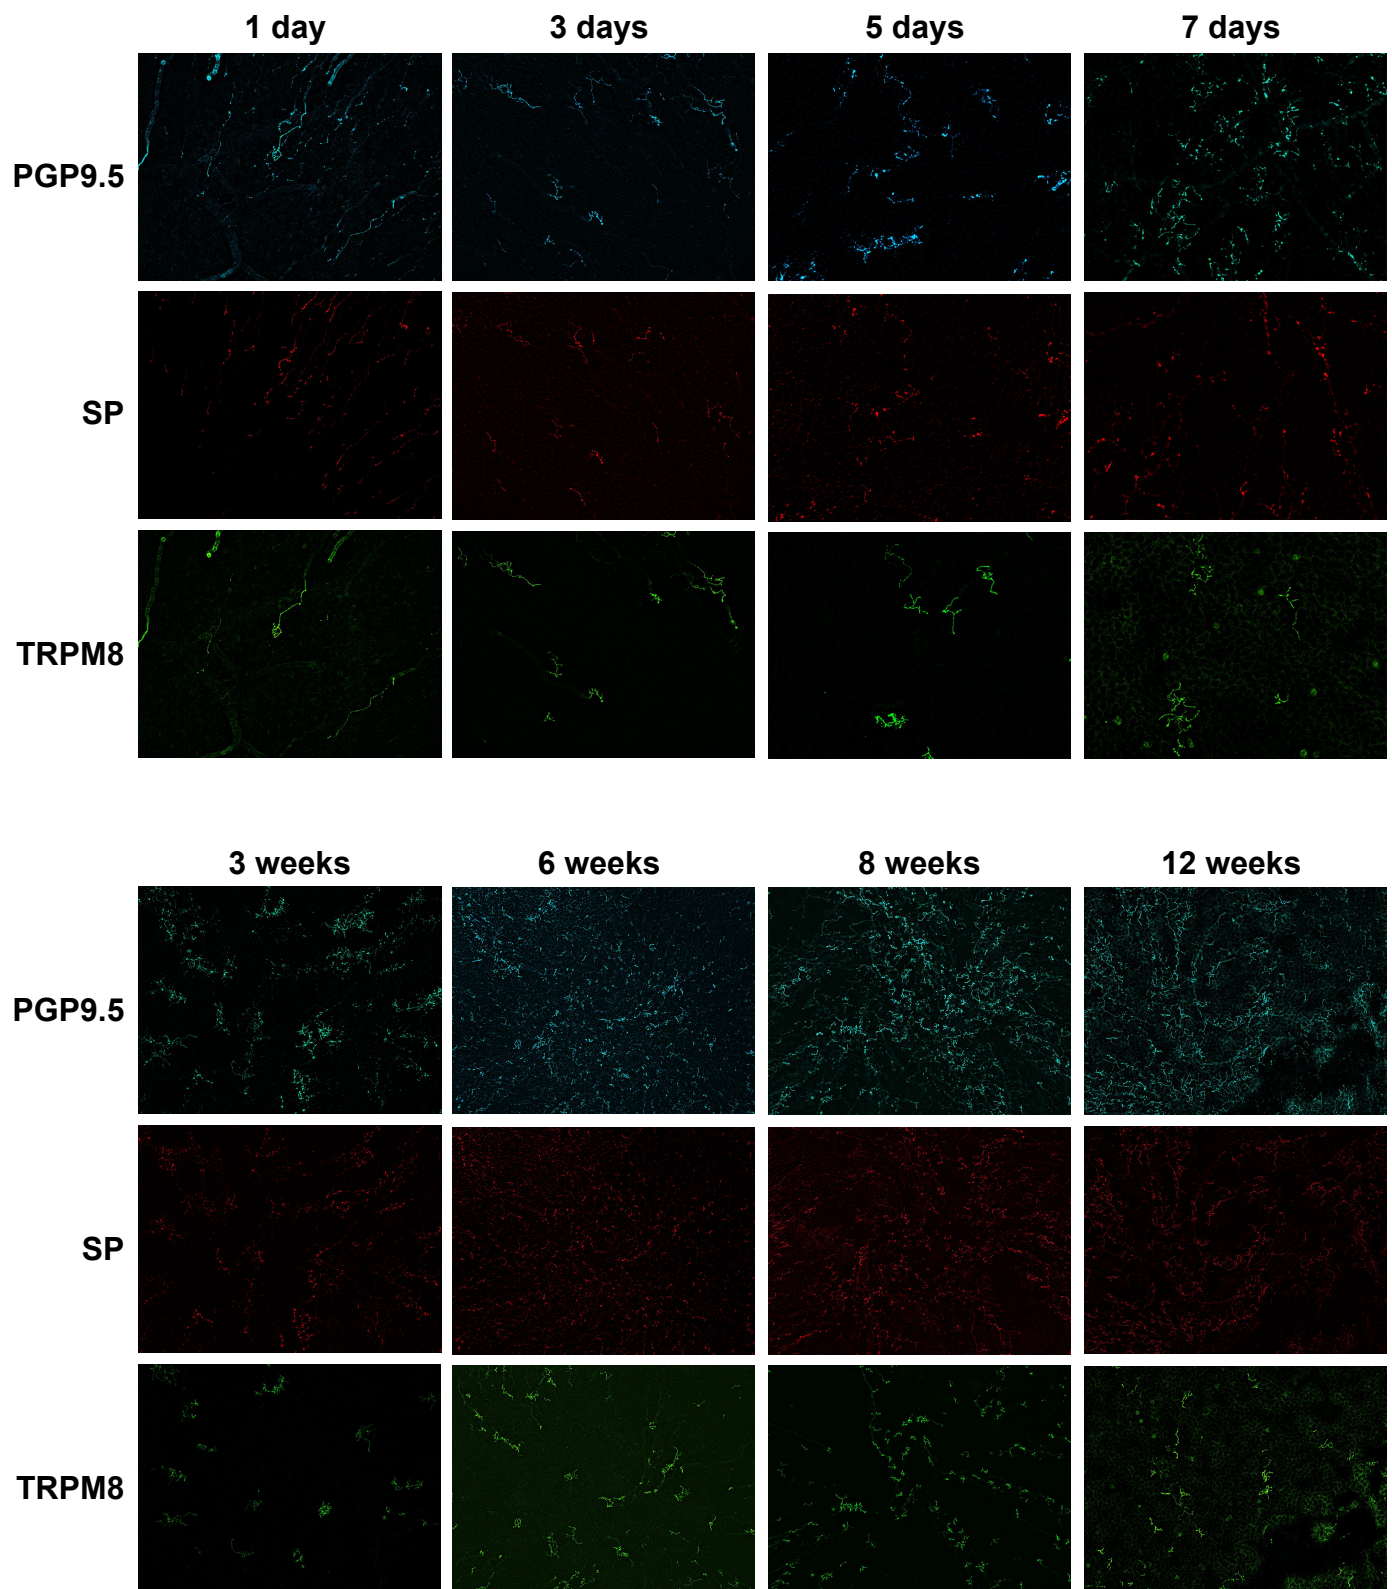

**Supplementary Figure 1.** Representative images showing the nerve terminals in the mouse center cornea at different times after injury.
