# Supplementary material for: Remodeling of Substance P Sensory Nerves and Transient Receptor Potential Melastatin 8 (TRPM8) Cold Receptors After Corneal Experimental Surgery
Source: PubMed Central journal article supplement — Invest Ophthalmol Vis Sci. 2019 Jun;60(7):2449–60. doi: 10.1167/iovs.18-26384 (PMC6545819; doi:10.1167/iovs.18-26384), 2019-06
Supplement: iovs-60-06-37_s05.pdf [file iovs-60-06-37_s05.pdf]

## **Supplement Legends**

**Supplementary Video 1.** Mouse corneal nerve regeneration 1 day post-injury. Videos showing images from the surface nerve terminals to the stroma nerves in the mouse center cornea recorded at 1 day after injury.

**Supplementary Video 2.** Mouse corneal nerve regeneration 3 days post-injury. Videos showing images from the surface nerve terminals to the stroma nerves in the mouse center cornea recorded at 3 days after injury.

**Supplementary Video 3.** Mouse corneal nerve regeneration 3 weeks post-injury. Videos showing images from the surface nerve terminals to the stroma nerves in the mouse center cornea recorded at 3 weeks after injury.

**Supplementary Figure 1.** Representative images showing the nerve terminals in the mouse center cornea at different times after injury.
